# Supplementary material for: Urinary Concentrations of Phthalate Metabolites and Bisphenol A and Associations with Follicular-Phase Length, Luteal-Phase Length, Fecundability, and Early Pregnancy Loss
Source: PubMed Central journal article supplement (PMC4786975; doi:10.1289/ehp.1408164), 2015-07-10
Supplement: ehp.1408164.s001.acco.pdf [file ehp.1408164.s001.acco.pdf]

**Note to Readers:** *EHP* strives to ensure that all journal content is accessible to all readers. However, some figures and Supplemental Material published in *EHP* articles may not conform to 508 standards due to the complexity of the information being presented. If you need assistance accessing journal content, please contact [ehp508@niehs.nih.gov](mailto:ehp508@niehs.nih.gov). Our staff will work with you to assess and meet your accessibility needs within 3 working days.

## **Supplemental Material**

# **Urinary Concentrations of Phthalate Metabolites and Bisphenol A and Associations with Follicular-Phase Length, Luteal-Phase Length, Fecundability, and Early Pregnancy Loss**

Anne Marie Jukic, Antonia M. Calafat, D. Robert McConnaughey, Matthew P. Longnecker, Jane A. Hoppin, Clarice R. Weinberg, Allen J. Wilcox, and Donna D. Baird

### **Table of Contents**

**Table S1.** Number of cycles contributed by each woman in the time to pregnancy analysis (706 cycles total).

**Table S2.** Urinary concentrations of phthalate metabolites by demographic and behavioral characteristics for the 221 women enrolled in the Early Pregnancy Study, 1982-1985.

**Table S1.** Number of cycles contributed by each woman in the time-to-pregnancy analysis (706 cycles total).

| Cycles | N (%)   |
|--------|---------|
| 1      | 62 (28) |
| 2      | 41 (19) |
| 3      | 39 (18) |
| 4      | 19 (9)  |
| 5      | 15 (7)  |
| 6      | 23 (10) |
| 7      | 21 (10) |
| 9      | 1 (0.5) |

**Table S2.** Urinary concentrations of phthalate metabolites by demographic and behavioral characteristics for the 221 women enrolled in the Early Pregnancy Study, 1982-1985.

|                                                                  | N (%)                        | MEP       | MnBP     | MBzP   | MEHP    | MEHHP   | MEOHP   | MCNP    | MCOP    | MCPP     | MECPP    | MiBP    | BPA     |
|------------------------------------------------------------------|------------------------------|-----------|----------|--------|---------|---------|---------|---------|---------|----------|----------|---------|---------|
|                                                                  | Mean (se) (ng/mg creatinine) |           |          |        |         |         |         |         |         |          |          |         |         |
| Age (years)                                                      |                              |           |          |        |         |         |         |         |         |          |          |         |         |
| 21 - 27                                                          | 88 (40)                      | 158 (19)  | 75 (5)   | 49 (6) | 7 (0.9) | 49 (9)  | 30 (5)  | 5 (0.8) | 4 (0.5) | 13 (1)   | 63 (8)   | 4 (1)   | 3 (0.3) |
| 28 - 30                                                          | 62 (28)                      | 257 (47)  | 106 (33) | 37 (3) | 10 (2)  | 70 (10) | 41 (6)  | 5 (0.8) | 3 (0.1) | 11 (0.8) | 89 (13)  | 5 (1)   | 2 (0.2) |
| 31 - 42                                                          | 71 (32)                      | 251 (93)  | 113 (32) | 43 (7) | 7 (0.9) | 52 (6)  | 31 (3)  | 4 (0.6) | 3 (0.3) | 14 (1)   | 66 (6)   | 4 (0.6) | 2 (0.2) |
| Education                                                        |                              |           |          |        |         |         |         |         |         |          |          |         |         |
| Some college, or less                                            | 63 (29)                      | 233 (43)  | 113 (35) | 42 (4) | 8 (0.8) | 49 (6)  | 29 (3)  | 5 (0.7) | 3 (0.2) | 13 (1)   | 62 (5)   | 6 (2)   | 2 (0.2) |
| College graduate                                                 | 84 (38)                      | 277 (81)  | 74 (7)   | 42 (6) | 8 (1)   | 58 (10) | 36 (6)  | 4 (0.7) | 3 (0.2) | 12 (1)   | 72 (10)  | 3 (0.5) | 3 (0.2) |
| At least some graduate school                                    | 74 (33)                      | 131 (14)  | 105 (27) | 47 (7) | 9 (1)   | 60 (8)  | 36 (5)  | 5 (0.7) | 3 (0.6) | 13 (1)   | 78 (10)  | 4 (0.7) | 3 (0.2) |
| Parity                                                           |                              |           |          |        |         |         |         |         |         |          |          |         |         |
| 0                                                                | 107 (48)                     | 175 (21)  | 103 (20) | 50 (7) | 7 (0.7) | 50 (7)  | 29 (4)  | 4 (0.6) | 3 (0.4) | 13 (1)   | 61 (6)   | 5 (1)   | 3 (0.2) |
| 1                                                                | 86 (39)                      | 284 (81)  | 95 (26)  | 39 (3) | 8 (1)   | 58 (7)  | 34 (4)  | 6 (0.8) | 3 (0.2) | 12 (0.9) | 74 (8)   | 3 (0.4) | 3 (0.2) |
| >=2                                                              | 28 (13)                      | 159 (24)  | 70 (6)   | 36 (4) | 10 (3)  | 73 (17) | 44 (10) | 3 (0.8) | 3 (0.2) | 12 (1)   | 100 (23) | 5 (2)   | 2 (0.2) |
| Smoking status                                                   |                              |           |          |        |         |         |         |         |         |          |          |         |         |
| Current                                                          | 15 (7)                       | 152 (35)  | 79 (12)  | 37 (9) | 8 (2)   | 47 (9)  | 29 (6)  | 4 (1)   | 2 (0.2) | 10 (1)   | 61 (11)  | 8 (5)   | 2 (0.4) |
| Former                                                           | 52 (24)                      | 197 (46)  | 112 (42) | 35 (3) | 9 (1)   | 74 (16) | 43 (9)  | 6 (1)   | 3 (0.2) | 14 (2)   | 87 (14)  | 3 (0.4) | 3 (0.3) |
| Never                                                            | 154 (70)                     | 228 (45)  | 92 (14)  | 47 (5) | 8 (0.8) | 51 (5)  | 30 (3)  | 4 (0.5) | 3 (0.3) | 12 (0.7) | 67 (6)   | 4 (0.7) | 3 (0.2) |
| Body mass index (kg/m <sup>2</sup> )                             |                              |           |          |        |         |         |         |         |         |          |          |         |         |
| ≤ 20                                                             | 81 (37)                      | 222 (38)  | 101 (27) | 48 (8) | 8 (0.9) | 55 (7)  | 32 (4)  | 4 (0.7) | 3 (0.2) | 13 (1)   | 69 (7)   | 4 (0.9) | 3 (0.2) |
| >20 - 25                                                         | 115 (52)                     | 224 (58)  | 96 (18)  | 44 (4) | 8 (1.0) | 57 (8)  | 35 (4)  | 5 (0.6) | 3 (0.4) | 13 (0.9) | 73 (8)   | 5 (0.8) | 3 (0.2) |
| >25                                                              | 25 (11)                      | 158 (35)  | 80 (15)  | 32 (3) | 7 (2)   | 54 (15) | 30 (7)  | 5 (0.9) | 4 (0.4) | 11 (1)   | 70 (17)  | 4 (2)   | 3 (0.2) |
| Caffeine intake (mg/month)                                       |                              |           |          |        |         |         |         |         |         |          |          |         |         |
| ≤ 1480                                                           | 62 (28)                      | 262 (105) | 79 (8)   | 40 (5) | 6 (0.9) | 40 (4)  | 24 (2)  | 4 (0.8) | 3 (0.2) | 11 (0.7) | 53 (4)   | 4 (1)   | 2 (0.2) |
| >1480 - <6900                                                    | 111 (50)                     | 185 (28)  | 112 (27) | 48 (6) | 9 (1)   | 66 (9)  | 39 (5)  | 5 (0.7) | 3 (0.2) | 13 (1)   | 81 (9)   | 4 (0.6) | 3 (0.2) |
| ≥ 6900                                                           | 48 (22)                      | 225 (37)  | 80 (7)   | 40 (4) | 7 (1)   | 54 (7)  | 33 (4)  | 4 (0.7) | 4 (0.9) | 13 (1)   | 72 (8)   | 4 (2)   | 3 (0.3) |
| Alcohol intake (servings/week)                                   |                              |           |          |        |         |         |         |         |         |          |          |         |         |
| 0                                                                | 57 (26)                      | 302 (114) | 113 (36) | 38 (4) | 8 (1)   | 46 (6)  | 28 (3)  | 5 (1)   | 3 (0.2) | 12 (1)   | 62 (8)   | 5 (1)   | 2 (0.2) |
| 1 - 18                                                           | 113 (51)                     | 155 (17)  | 93 (20)  | 44 (5) | 8 (1)   | 59 (8)  | 35 (5)  | 5 (0.6) | 3 (0.4) | 12 (0.8) | 77 (9)   | 4 (0.8) | 3 (0.2) |
| >18                                                              | 51 (23)                      | 255 (57)  | 82 (5)   | 50 (9) | 8 (1)   | 60 (9)  | 35 (5)  | 5 (0.8) | 3 (0.3) | 14 (2)   | 69 (7)   | 4 (0.8) | 3 (0.3) |
| Used oral contraceptives within 90 days of menstrual cycle start |                              |           |          |        |         |         |         |         |         |          |          |         |         |
| Yes                                                              | 33 (15)                      | 173 (29)  | 81 (10)  | 40 (5) | 7 (2)   | 59 (23) | 35 (12) | 6 (1)   | 3 (0.3) | 11 (1)   | 70 (19)  | 5 (2)   | 3 (0.4) |
| No                                                               | 184 (85)                     | 226 (40)  | 98 (16)  | 45 (4) | 8 (0.7) | 56 (5)  | 33 (3)  | 4 (0.4) | 3 (0.3) | 13 (0.7) | 71 (5)   | 4 (0.5) | 3 (0.1) |
